## THE BIOLOGICAL ROLE OF CARBON DIOXIDE

DAVID R. GODDARD, PH.D.

CARBON dioxide is found in all environments in which life occurs. Although some of the large organisms may produce sufficient  $\text{CO}_2$  in their metabolism that they are not dependent upon external  $\text{CO}_2$ , and may be independent of external  $P_{\text{CO}_2}$  so long as it is low ( $< 0.01$  to  $0.05$  atmospheres), there is little doubt that all cellular and multicellular organisms require  $\text{CO}_2$ .

Although the first organisms may have evolved in a world of methane and organic compounds,<sup>1</sup>  $\text{CO}_2$  has been part of the aquatic and atmospheric life for well in excess of a billion years.<sup>2</sup> It is not surprising, therefore, to find that  $\text{CO}_2$  is an active partner in many aspects of metabolism of all organisms.

During the nineteenth century and the early decades of the twentieth century, it was assumed that the only metabolic role of  $\text{CO}_2$  was its utilization in the metabolism of green plants in the light, and that other organisms (nongreen plants, bacteria, animals) produced  $\text{CO}_2$  in irreversible reactions. This view, which is still part of much teaching, persisted in spite of the ever-increasing evidence in human physiology of the complex relation between  $\text{CO}_2$  of tissues and the external environment. When Rockwell<sup>3</sup> and Rockwell and Highberger<sup>4</sup> reported in 1921 and 1927 that certain bacteria, yeasts, and molds required  $\text{CO}_2$  for growth and incorporated the carbon into carbon compounds, their results were ignored or denied.

In 1936 Wood and Werkman<sup>5</sup> showed that the conversion of carbohydrates to propionic acid by the propionic bacteria occurred with the incorporation of  $\text{CO}_2$ . This was confirmed later<sup>6,7</sup> through the use of carbon isotopes. Work done since 1940 has made it clear that the reactions of  $\text{CO}_2$  release are reversible, and that carbon dioxide may be liberated or absorbed, depending upon conditions, in a wide variety of organisms. Carbon dioxide incorporation has largely been obscured in nongreen plants by the excess  $\text{CO}_2$  production, but isotopic methods have made it pos-

Dr. Goodard is Gustave C. Kuemmerle Professor of Botany, and Director, Division of Biology, University of Pennsylvania, Philadelphia, Pennsylvania.

sible to show incorporation in spite of excess production, and to demonstrate that in many (probably all) organisms certain biochemical pathways are necessarily coupled to  $\text{CO}_2$  utilization. Though the reduction of  $\text{CO}_2$  to carbohydrates in photosynthesis depends upon the energy of sunlight, as we shall show below, the actual pathways of  $\text{CO}_2$  incorporation occur in nonphotochemical reactions.

### CARBON DIOXIDE AND METABOLISM

Fortunately, the evolution of biological systems has been such that in spite of great morphological diversity the metabolic systems are surprisingly similar for very dissimilar organisms. This is illustrated in the metabolism of  $\text{CO}_2$ .

In cellular respiration, many oxidative steps do not directly produce  $\text{CO}_2$ , as biological oxidation occurs primarily by electron transfer over a series of oxidation-reduction catalysts (the respiratory enzymes and coenzymes) or by dehydrogenation. Carbon dioxide is produced primarily in the decarboxylation of  $\alpha$ -keto acids, though these decarboxylations are often coupled to oxidative steps. Thus, we find the citric acid cycle, the Embden-Meyerhof fermentation pathway, and the pentose-phosphate pathway operative in such dissimilar organisms as yeasts and bacteria, mammals, and in higher plants.

Succulent plants (Bryophyllum, cacti, etc.), which produce organic acids (primarily malic acid) in the dark from carbohydrates, do so in oxidative metabolism and with  $\text{CO}_2$  absorbed from the environment.<sup>8</sup> Until this was discovered it had been impossible to write balanced equations showing the conversion of sugars to malic acid. This problem is resolved by the incorporation of  $\text{CO}_2$ . The non-photochemical reduction of  $\text{CO}_2$  requires energy, but here the energy is furnished by the oxidation of organic compounds, through the intermediate action of energy stored in adenosine triphosphate and reduced pyridine nucleotides. In most cases, the production of  $\text{CO}_2$  is far greater than the amount fixed, but in the succulent plants, in the dark, there is no  $\text{CO}_2$  production but there is a net utiliza-

tion of carbohydrate and the energy released in the oxidation of sugars to organic acids is used in the fixation of  $\text{CO}_2$ .

That the reduction of  $\text{CO}_2$  to the level of carbohydrates occurs in photosynthetic reactions without the direct participation of light is clear from the following observations. McAlister<sup>9</sup> found that in green plants undergoing a steady photosynthesis, after a sudden interruption of the light, there is a continued absorption of  $\text{CO}_2$  for 90 to 170 seconds. Calvin, *et al.*<sup>10</sup> then demonstrated that if radioactive  $\text{CO}_2$  is furnished to plants in the dark, after a prior light period, the  $\text{CO}_2$  is reduced to the level of carbohydrates, the amount reduced being equal to that reduced in one minute of photosynthesis; no such reduction occurred in comparable plants lacking the prior light period. It was thus clear that during the light some compounds were produced that could reduce  $\text{CO}_2$  to carbohydrates. The energy for  $\text{CO}_2$  reduction is furnished by the radiant energy of the light, but the energy is passed on by catalytic substances acting in a cyclical manner. These results made it possible to separate the photochemical aspects of photosynthesis from the enzymatic steps of  $\text{CO}_2$  reduction.

Earlier work by Hill<sup>11</sup> had already demonstrated that the photolysis of water, with the liberation of  $\text{O}_2$ , was independent of  $\text{CO}_2$  reduction. The work of Strehler,<sup>12</sup> Frankel,<sup>12</sup> and of Arnon<sup>14</sup> has shown that the reduction of  $\text{CO}_2$  occurs in nonphotochemical reactions through reaction with adenosine triphosphate and a hydrogen donor (perhaps reduced pyridine nucleotides). The adenosine triphosphate and the reducing agent are formed during the photochemical reactions. Thus the final stage of  $\text{CO}_2$  reduction in photosynthesis is a series of reactions similar to those recognized as part of the carbohydrate metabolism of nonphotosynthetic organisms.

Though we cannot recount here details of the reactions of carbohydrate metabolism, we

can give a few of them and so show the reversible entrance of  $\text{CO}_2$  into metabolism.

The release of  $\text{CO}_2$  may occur in one of several decarboxylation reactions, a few of which are illustrated below:

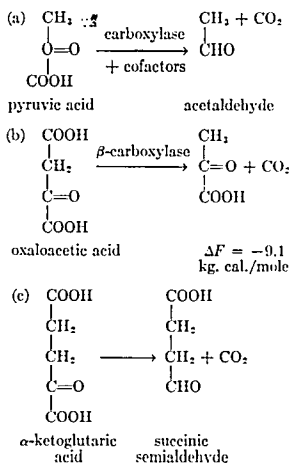

The actual reactions are far more complex than illustrated. The equilibrium for these reactions lies far on the side of  $\text{CO}_2$  release, and, in fact, such reactions were considered irreversible.

Wood, *et al.*<sup>7</sup> were able to demonstrate, with isotopic  $\text{CO}_2$ , that reaction (b) is reversible, *i.e.*, that isotopic C introduced as  $\text{CO}_2$  could be found in the carboxyl group of organic acids. Though the reversal of this particular reaction may not be physiologically of great importance, these experiments changed our whole outlook on the biological activity of  $\text{CO}_2$ .

Ochoa<sup>15</sup> found a reaction of considerable interest, the reversible incorporation of  $\text{CO}_2$  into malic acid:

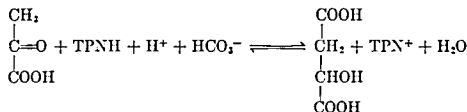

$\Delta F = 3.0$  kg. cal./mole  
 TPNH = reduced triphosphopyridine nucleotide  
 TPN<sup>+</sup> = oxidized triphosphopyridine nucleotide.

This reaction could be followed on the spectrophotometer, because of high absorption of TPNH at 340 m $\mu$ . The reaction is mobile, and may be readily shifted from right to left, or *vice versa*, by varying the concentration of

the reactants. Vennesland and co-workers<sup>16</sup> found a similar enzyme in higher plants. The energy for the carboxylation can be thought of as being furnished by the reduced TPNH.

In similar fashion, reversible reactions are known for isocitrate and  $\alpha$ -ketoglutaric acids:

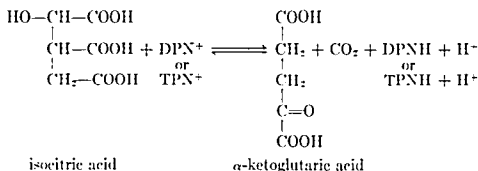

DPN<sup>+</sup> and DPNH represent oxidized and reduced diphosphopyridine nucleotides.

Enzymes are known which react either with TPN or DPN, and this reaction is reversible,

allowing CO<sub>2</sub> incorporation or release, depending upon the concentration of the reactants.

The decarboxylation of  $\alpha$ -ketoglutaric acid is of some interest:

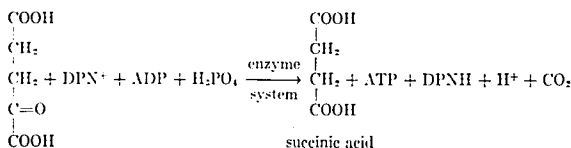

Here, the enzyme system involves at least two enzymes and coenzyme A. The reaction may proceed from left to right or the reverse.

We are interested in these reactions because they are an important part of carbohydrate degradation, but they are all responsive to the P<sub>CO<sub>2</sub></sub> and may serve, in part, for CO<sub>2</sub> fixation in nonphotosynthetic reactions.

There is some doubt whether any of these reactions is of importance in photosynthesis, since they all require an appreciable P<sub>CO<sub>2</sub></sub> while photosynthesis occurs at high velocity at P<sub>CO<sub>2</sub></sub> = 3 × 10<sup>-4</sup> atmosphere and at maximum velocity at 1 to 2 × 10<sup>-3</sup> atmosphere.

The hydrolysis of a phosphate bond may yield energy that can be used for the addition of CO<sub>2</sub> as a carboxyl group:

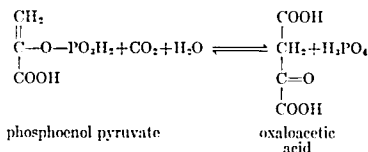

This reaction is catalyzed by phosphoenol pyruvic carboxylase.

Perhaps the most startling result was the discovery that in photosynthesis a 5-carbon phosphate sugar gave rise to two molecules of phosphoglyceric acid:

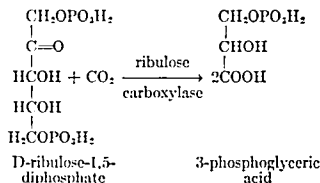

This enzyme, ribulose carboxylase, appears to be limited to the chloroplasts, and is presumably limited to photosynthetic activity. The phosphoglyceric acid may then undergo reduction to triosephosphates through the energy stored in ATP and reduced nucleotides. The trioses not only can be converted to sugars and starches but, through a series of cyclical

TABLE I  
CARBON ON THE EARTH\*

|                  | As CO <sub>2</sub>  | As C    | g./cm. <sup>2</sup> † |
|------------------|---------------------|---------|-----------------------|
|                  | 10 <sup>20</sup> g. |         |                       |
| Atmosphere       | 0.0233              | 0.00635 | 0.124                 |
| Fresh water      | 0.009               | 0.0024  | 0.047                 |
| Seas             | 1.29                | 0.352   | 6.9                   |
| Biospere         | 0.145               | 0.04    | 0.784                 |
| Rocks            |                     |         |                       |
| As carbonates    | 674.0               | 184.0   | 3,600.0               |
| Other forms of C | 246.0               | 67.0    | 1,313.0               |
| Fossil fuels     | 0.27                | 0.73    | 14.3                  |
| Total            | 921.74              | 250.93  |                       |

\* Data from Rubey.<sup>15</sup>† g./cm.<sup>2</sup> earth's surface, calculated on basis of earth's surface =  $5.1 \times 10^{18}$  cm.<sup>2</sup>

reactions, regenerate ribulose diphosphate to keep the process functioning. If one follows the reactions through in detail, it appears that three molecules of ATP and two of reduced TPNH (or DPNH) are required for each molecule of CO<sub>2</sub> reduced to the level of a carbohydrate.

Carbon dioxide has many physiological effects, aside from its role in photosynthesis. We will omit consideration of its role in the mammalian blood system and its effect in the regulation of the frequency and depth of breathing. Loomis<sup>17</sup> has summarized some of the actions of P<sub>CO<sub>2</sub></sub> as a regulator of embryonic growth. Free CO<sub>2</sub> must act, either by changing the pH or participating in chemical reactions, where the equilibrium (or steady state level) is highly sensitive to P<sub>CO<sub>2</sub></sub>.

The reactions outlined above may not be the critical reactions, but the biochemistry of CO<sub>2</sub> has proceeded far enough for us to recognize that CO<sub>2</sub> is a highly reactive cellular metabolite. We may expect that the understanding of the individual reactions in which CO<sub>2</sub> participates may furnish the understanding of its complex physiological role in the cells and tissues of bacteria, fungi, and higher plants and animals.

#### INTERNAL ENVIRONMENT AND CARBON DIOXIDE

Carbon dioxide in the atmosphere is at very low level, a P<sub>CO<sub>2</sub></sub> of about  $3.2 \times 10^{-4}$  atmos-

phere (0.23 mm.). The leaves of higher plants may function at this low CO<sub>2</sub> pressure. Many microorganisms may be in diffusion equilibrium with environmental CO<sub>2</sub>, but because of ecological environments (whether soils, waters, or the tissues of higher animals or plants) the P<sub>CO<sub>2</sub></sub> is usually from 10 to 200 times that of the atmosphere. We recognize that P<sub>CO<sub>2</sub></sub> of blood and mammalian tissues is far from diffusion equilibrium with the atmosphere, but it is not so generally recognized that this is also true of plant stems, roots, fruits, and most metazoans. Diffusion equilibrium is apparently the exception in the biological world.

Therefore a clear distinction is required between the internal and external environments. This may be illustrated by the problem of mammalian tissue cultures.<sup>17</sup> If tissue cultures are in mass and in a closed system, the metabolic activity will raise the P<sub>CO<sub>2</sub></sub>. However, if mammalian tissues are exposed to air, CO<sub>2</sub> will escape from the tissue, which was in prior equilibrium with blood, and the pH may rise and the tissue die. At least as early as 1937 this problem was faced and, on theoretical grounds, the proposal was made and adopted to use 5 per cent CO<sub>2</sub> in air when a gaseous stream was passed over a tissue culture in a bicarbonate-containing medium.

#### ENVIRONMENTAL CARBON DIOXIDE

Carbon is the sixth most abundant cosmic element, though it is less abundant in the outer crust of the earth than the inner. The figures in table I are from Rubey<sup>15</sup> and are to be considered as estimates. The total carbon of the lithosphere, hydrosphere and atmosphere is approximately  $\times 51 \times 10^{20}$  g. (or  $251 \times 10^{14}$  metric tons). This corresponds to  $921 \times 10^{20}$  g. of CO<sub>2</sub>. The CO<sub>2</sub> of the atmosphere is about 1/40,000 of the total, and the total CO<sub>2</sub> of the seas (CO<sub>2</sub>, HCO<sub>3</sub><sup>-</sup>, and CO<sub>3</sub><sup>2-</sup>) is 55 times the amount of the atmosphere. It is clear that the greatest mass of the earth's carbon is locked in the carbonate of rocks.

*The Atmosphere.* Though we normally consider the CO<sub>2</sub> content of the atmosphere as constant, and usually assign it a value of 0.03 per cent, considerable variations from this value occur. Though the P<sub>CO<sub>2</sub></sub> decreases

with altitude, the percentage composition is not markedly affected by altitude<sup>19</sup> and a value of  $0.029 \pm 0.002$  per cent was indicated by data from the rocket Explorer II at 72,000 feet.<sup>20</sup> However, Buch<sup>21</sup> found that over the North Atlantic the  $\text{CO}_2$  in air in equilibrium with the sea was 0.0329 per cent, while in arctic the average was 0.0308 per cent, with values as low as 0.015 per cent being recorded. In general, a decrease in the  $\text{CO}_2$  content of sea water and in air is found from tropical to northern seas.

Industrial and biological activity can cause considerable variation in atmospheric  $\text{CO}_2$ . This is most marked on days when the wind velocity is below one to two miles per hour. For example, Chapman, Gleeson and Loomis<sup>22</sup> have followed the diurnal variation of atmospheric  $\text{CO}_2$  in an Iowa corn field at one and 152 m. above the ground. On a calm day (wind one to two miles per hour) the peak  $\text{CO}_2$  was found at 4:00 A.M. at 1.0 m. to be 0.0477 per cent. By 7:00 A.M. this had fallen to 0.03 per cent, and the minimum of 0.022 per cent occurred at 1:00 P.M. with a rise to 0.03 per cent just after sunset. At 152 m., the changes were smaller, but even at this elevation the photosynthesis lowered the  $\text{CO}_2$  level during daylight hours. An Iowa corn field may remove 200 pounds of  $\text{CO}_2$  per acre per day (maximum value of 400 pounds). This corresponds to the total  $\text{CO}_2$  in a column of air 333 m. Easily detectable decreases during sunny hours were determined even when the wind was eight miles per hour. The increase during the night was probably due largely to plant respiration and in part to respiration of soil organisms.

**Fresh Water.** Lakes and rivers constitute a small part of the earth's surface, but they are an important habitat for many organisms.

TABLE 2  
THE APPARENT DISSOCIATION CONSTANT  
FOR CARBONIC ACID

| Temperature (Centigrade) | $K_a$                 | $pK_a$ |
|--------------------------|-----------------------|--------|
| 0                        | $2.65 \times 10^{-7}$ | 6.58   |
| 5                        | $3.04 \times 10^{-7}$ | 6.52   |
| 10                       | $3.43 \times 10^{-7}$ | 6.46   |
| 15                       | $3.80 \times 10^{-7}$ | 6.42   |
| 20                       | $4.15 \times 10^{-7}$ | 6.38   |
| 25                       | $4.45 \times 10^{-7}$ | 6.35   |

TABLE 3  
THE PROPORTIONS OF  $\text{CO}_2$ ,  $\text{HCO}_3^-$ , AND  $\text{CO}_3^{2-}$  IN WATER AT VARIOUS pH VALUES AND 15 C.

| pH | $\text{CO}_2$      | Total Free $\text{HCO}_3^-$ | $\text{CO}_3^{2-}$    |
|----|--------------------|-----------------------------|-----------------------|
| 4  | 0.996              | 0.004                       | $1.25 \times 10^{-9}$ |
| 5  | 0.962              | 0.038                       | $1.20 \times 10^{-7}$ |
| 6  | 0.725              | 0.275                       | $0.91 \times 10^{-3}$ |
| 7  | 0.208              | 0.792                       | $2.60 \times 10^{-1}$ |
| 8  | 0.025              | 0.972                       | $3.20 \times 10^{-1}$ |
| 9  | 0.003              | 0.996                       | 0.031                 |
| 10 | $2 \times 10^{-1}$ | 0.757                       | 0.243                 |

Hutchinson<sup>23</sup> has given an excellent account of the chemical and physical properties of fresh waters. The composition of lake water is not a constant with depth, and there are also marked seasonal changes.

Carbon dioxide in fresh waters will exist as dissolved  $\text{CO}_2$ ,  $\text{H}_2\text{CO}_3$ ,  $\text{HCO}_3^-$ , and  $\text{CO}_3^{2-}$ . We can consider the following reactions as occurring:

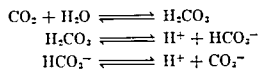

The dissociation of carbonic may be readily formulated:

$$K_{\text{H}_2\text{CO}_3} = \frac{(\text{H}^+)(\text{HCO}_3^-)}{(\text{CO}_2 \text{ total})}$$

The difficulty arises because the concentration of  $\text{H}_2\text{CO}_3$  is not known with precision. It has been reported as 1.105 to 0.56 per cent of the free  $\text{CO}_2$ . Berg and Patterson<sup>24</sup> have given the value of  $K_{\text{H}_2\text{CO}_3}$  as  $1.32 \pm 0.5 \times 10^{-4}$  at 25 C.

The problem is avoided by formulating the equation as follows:

$$K_a = \frac{(\text{H}^+)(\text{HCO}_3^-)}{(\text{CO}_2 \text{ total})}$$

where  $\text{CO}_2$  is total analytically determined  $\text{CO}_2$ . The equation is valid for very dilute solutions, and  $K_a$  may be considered the apparent dissociation constant. Its value from Horned and Davis<sup>25</sup> is given in table 2. The constant is not independent of the salt content of the waters; in lakes and rivers the divalent ions predominate, and the constant can be

TABLE 4

| CARBON DIOXIDE CONTENT OF SELECTED SOILS | Percent $\text{CO}_2$ in Air Spaces |                  |
|------------------------------------------|-------------------------------------|------------------|
|                                          | At 6-inch depth                     | At 18-inch depth |
| Arable land (manured)                    | 0.34                                | 0.5              |
| Arable land (not manured)                | 0.34                                | 0.45             |
| Grassland                                | 1.46                                | 1.64             |
| Water-logged soil                        | 3.9 to 9.1                          |                  |

corrected for dissolved salts as follows:

$$pK_a' = pK_a - 0.53 \sqrt{m}$$

where  $m$  = molarity of the solution.

In fresh waters where the  $\text{pH}$  is usually below 8.0 we are rarely concerned with the second dissociation constant of  $\text{CO}_2$ . Table 3, from Hutchinson,<sup>23</sup> is of some interest in showing the distribution of  $\text{CO}_2$  in various forms for fresh waters.

The situation in lakes is complex, and the interested reader is referred to Hutchinson.<sup>23</sup> The  $\text{CO}_2$  content will depend in part upon equilibrium with the atmosphere, the withdrawal of  $\text{CO}_2$  in photosynthesis, the addition by respiration, and the addition of acids or alkali from soil waters. The effect of temperature on  $\text{CO}_2$  solubility cannot be ignored. Many lakes will be stratified, with high  $\text{CO}_2$  content in lower levels.

**Soil Carbon Dioxide.** Russell and Appleyard<sup>26</sup> have studied the  $\text{CO}_2$  content of agricultural soils. Table 4 has been constructed from their values. Though the composition of the gases of soils is highly variable, and will depend upon water content, total organic matter, and temperature, it is to be recognized that soil organisms and the roots of plants live in environments where the  $\text{CO}_2$  content is 10 to 100 times that of the atmosphere.

**The Seas.** The surface waters of the open oceans in temperate latitudes is constant. The sodium chloride content will be about 3.5 g./l., expressed as salinity (S) per cent 35. The  $\text{pH}$  will vary from approximately 8.1 to 8.3. The total  $\text{CO}_2$  ( $\text{CO}_2$ ,  $\text{HCO}_3^-$ ,  $\text{CO}_3^{2-}$ ) is approximately 46 ml./l.

The composition of sea water is shown in table 5. The total  $\text{CO}_2$  content and free  $\text{CO}_2$

of sea water, in relation to  $\text{pH}$ , are shown in table 6. Melting arctic ice and large rivers will dilute sea water, and, as the salinity is decreased, the constants affecting the dissociation of  $\text{CO}_2$  are also changed.

The dissociation constants of carbonic acid change with the salt content, temperature, and pressure. Buch<sup>27</sup> has constructed tables giving the values of  $K_a'$  and  $K_{a2}'$  at different temperatures and salinity; these tables have been reproduced by Harvey.<sup>28</sup> The effect of salt on the constants is shown below:

|            | Water             | Sea Water (S per cent 35) |
|------------|-------------------|---------------------------|
|            | Temperature 15 C. |                           |
| $pK_a'$    | 6.43              | 6.04                      |
| $pK_{a2}'$ | 10.43             | 9.07                      |

Since surface sea waters have a  $\text{pH}$  of 8.0 to 8.3, the bicarbonate/carbonate system will be dominant.

The  $\text{CO}_2$  content of surface waters is modified by biological activity. The phytoplankton absorb free  $\text{CO}_2$  in photosynthesis, and this results in a decreased  $\text{PCO}_2$  and a rise in  $\text{pH}$ . The  $\text{CO}_2$  is partially replaced by the conversion of bicarbonate to carbonate:

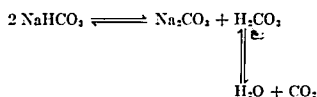

TABLE 5  
COMPOSITION OF SEA WATER AT 15 C.,  
S per cent 35,  $\text{pH}$  8.15

|                           | g./kg. | g./l.       | Molarity  |
|---------------------------|--------|-------------|-----------|
| Total salts               | 35.1   | 36          | 0.558     |
| Sodium                    | 10.77  | 11.1        | 0.483     |
| Magnesium                 | 1.3    | 1.33        | 0.0547    |
| Calcium                   | 0.409  | 0.42        | 0.0105    |
| Potassium                 | 0.388  | 0.39        | 0.00997   |
| Strontium                 | 0.01   | 0.01        | 0.00011   |
| Chloride                  | 19.37  | 19.8        | 0.558     |
| Sulfate                   | 2.71   | 2.76        | 0.0287    |
| Bromide                   | 0.065  | 0.066       | 0.00083   |
| Boric acid                |        |             |           |
| $\text{H}_3\text{BO}_3$   | —      | 0.021       | 0.00033   |
| $\text{H}_2\text{BO}_3^-$ | —      | 0.0048      | 0.00008   |
| Total $\text{CO}_2$       | —      | 46.1 ml./l. | 0.00209   |
| $\text{CO}_2$             | —      | 0.29 ml./l. | 0.0000128 |
| $\text{HCO}_3^-$          | —      | —           | 0.00185   |
| $\text{CO}_3^{2-}$        | —      | —           | 0.00023   |
| $\text{O}_2$              | —      | 5.8 ml./l.  | 0.00026   |

TABLE 6  
CARBON DIOXIDE OF SEA WATER AT 15 C., 8 PER CENT 35

| pH                                                            | 7.1         | 7.8          | 8.0          | 8.1          | 8.2          | 8.3          | 8.4          | 8.5         |
|---------------------------------------------------------------|-------------|--------------|--------------|--------------|--------------|--------------|--------------|-------------|
| Total CO <sub>2</sub><br>moles/l. × 10 <sup>2</sup><br>ml./l. | 238<br>53.3 | 235<br>52.6  | 216<br>48.4  | 211<br>47.3  | 206<br>46.1  | 199<br>44.6  | 191<br>42.8  | 183<br>41   |
| P <sub>CO<sub>2</sub></sub><br>atmosphere × 10 <sup>2</sup>   | 230         | 85           | 50           | 39           | 29           | 22           | 15           | 12          |
| CO <sub>2</sub><br>moles/l. × 10 <sup>2</sup><br>ml./l.       | 8.91<br>2.0 | 3.31<br>0.74 | 1.95<br>0.44 | 1.57<br>0.34 | 1.13<br>0.25 | 0.86<br>0.19 | 0.58<br>0.13 | 0.47<br>0.1 |

In northern seas, the rapid growth of diatoms in the spring months results in a photosynthetic level which exceeds the combined respiration of algae, bacteria, and animals, with a resulting increase of pH and a fall of P<sub>CO<sub>2</sub></sub>. In the winter months respiration may exceed photosynthesis, with an increasing P<sub>CO<sub>2</sub></sub> and a fall of pH.

#### THE SEA AS A REGULATOR OF CARBON DIOXIDE

As early as 1880, Schlössing<sup>20</sup> proposed that the sea was a regulator of atmospheric CO<sub>2</sub>. The seas contain 55 times as much CO<sub>2</sub> as does the atmosphere. Krogh<sup>21</sup> and more recently Buch<sup>22</sup> have studied the equilibrium between atmospheric CO<sub>2</sub> and sea water. An excess of atmospheric CO<sub>2</sub> should result in absorption by the sea, with a resulting decrease in pH and a dissolution of CaCO<sub>3</sub>. Rubey<sup>23</sup> has calculated what would happen if the CO<sub>2</sub> content of air was increased fivefold, to 0.015 per cent (after equilibrium with the sea). To raise the level in the atmosphere fivefold would increase the total atmospheric CO<sub>2</sub> from 2.33 × 10<sup>18</sup> g. to 11.65 × 10<sup>18</sup> g. To increase the CO<sub>2</sub> of the atmosphere by this amount would require the addition of 81 × 10<sup>18</sup> g., of which some 1.7 × 10<sup>18</sup> g. would have dissolved in the sea. This increased CO<sub>2</sub> in the sea would result in the dissolution of CaCO<sub>3</sub>, the dissolution of lime rods would have added 62 × 10<sup>18</sup> g. of CO<sub>2</sub> and the final pH would be 7.8.

There is a belief<sup>24</sup> that the CO<sub>2</sub> content of the atmosphere has increased about 10 per cent since 1900. Such an increase would mean 2.2 × 10<sup>17</sup> g. of CO<sub>2</sub> in the atmosphere and, if equi-

librium had been reached with the sea, 90 per cent of the CO<sub>2</sub> would be expected to have been absorbed by the sea or, in other words, there would have been a total increase of 2.2 × 10<sup>18</sup> g. This corresponds to 8.5 × 10<sup>11</sup> metric tons of coal. The 2.2 × 10<sup>17</sup> g. of CO<sub>2</sub> in the atmosphere is not out of order with expected industrial production, as Callendar<sup>25</sup> estimated in 1940 an industrial production of 43 × 10<sup>15</sup> g. of CO<sub>2</sub> per year and for sixty years this is 2.68 × 10<sup>17</sup> g. in comparison with a suggested atmospheric increase of 2.2 × 10<sup>17</sup> g. The industrial production of CO<sub>2</sub> is inadequate to cause an increase of 10 per cent CO<sub>2</sub> in the atmosphere if nine-tenths of the CO<sub>2</sub> has entered the seas. Either the increase has not in fact occurred, or equilibrium with the seas has not been established. One would also expect an increase in atmospheric CO<sub>2</sub> to result in an increase in photosynthesis and an increased locking up of CO<sub>2</sub> in the biosphere.

#### GEOLOGICAL ORIGIN

Urey<sup>1</sup> and Kuiper<sup>26</sup> have proposed that the initial earth had a reducing atmosphere of methane, ammonia and hydrogen. Carbon dioxide is not stable in a hydrogen atmosphere. The gravitational field of the earth cannot permanently hold a hydrogen atmosphere, and hydrogen would escape except as it is bound in water, methane, metal hydrides and ammonia. The CO<sub>2</sub> of the atmosphere may have had its origin from volcanos and hot springs.<sup>2</sup> Though the rate of production is low (3 to 7 × 10<sup>15</sup> g. per year), only about 0.04 to 0.07 per cent of the current photosynthetic rate, the current

TABLE 7<sup>1</sup>  
RATE OF PHOTOSYNTHESIS ON LAND

|            | Area,<br>10 <sup>6</sup><br>cu. <sup>2</sup> | Areal Fixation,<br>mg./cm. <sup>2</sup> year |                 | Total Fixation<br>for Whole Area,<br>10 <sup>15</sup> g./year |                 |
|------------|----------------------------------------------|----------------------------------------------|-----------------|---------------------------------------------------------------|-----------------|
|            |                                              | C                                            | CO <sub>2</sub> | C                                                             | CO <sub>2</sub> |
| Forest     | 44                                           | 20                                           | 73.3            | 8.8                                                           | 32.3            |
| Cultivated | 27                                           | 16                                           | 58.6            | 4.3                                                           | 15.8            |
| Grassland  | 31                                           | 6                                            | 22              | 1.9                                                           | 7               |
| Desert     | 24                                           | 0.5                                          | 1.8             | 0.1                                                           | 0.2             |
| Total      | 126                                          | 12                                           | 44              | 15.1                                                          | 55              |

<sup>1</sup> From Hutchinson.<sup>2</sup>

atmosphere CO<sub>2</sub> could be produced in 60,000 years and that of the seas and atmosphere in a few million years. These are geologically very short times. On the other hand, life may have had its origin in an anaerobic world, with little or no CO<sub>2</sub> and the CO<sub>2</sub> may be of biological origin. Though one considers CO<sub>2</sub> to be produced by living organisms by the use of O<sub>2</sub> in respiration, chemical mechanisms for the degradation of organic compounds without utilization of oxygen are possible.

We do not know which gas occurred first, O<sub>2</sub> or CO<sub>2</sub>. Oxygen could have been first produced by the photochemical decomposition of water at high altitudes:

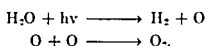

The hydrogen would then be lost to the earth. Kuiper<sup>33</sup> has calculated that the rate of this process could produce our atmosphere in  $5 \times 10^8$  years. This is a very low rate compared with present-day photosynthesis, since the estimate of photosynthetic rates indicates an O<sub>2</sub> production of  $55 \times 10^{15}$  g. per year,<sup>2,34</sup> or the atmospheric O<sub>2</sub> of  $12 \times 10^{20}$  g. could be pro-

duced in 22,000 years, and even a rate of one-fifth of this would form our O<sub>2</sub> in 100,000 years.

Thus the primitive O<sub>2</sub> and CO<sub>2</sub> may have had a nonbiological origin, but once photosynthetic life was firmly established the activities of organisms must have become dominant in the biological evolution of O<sub>2</sub>, water, and CO<sub>2</sub>.

#### THE CIRCULATION OF CARBON DIOXIDE

Generations of students have been taught that the respiration of animals balances the photosynthesis of plants. Such statements are usually in nonquantitative terms, and frequently ignore the role of plant respiration. Several workers have made efforts to estimate the quantity of photosynthesis. Table 7, from Hutchinson,<sup>2</sup> makes a respiratory correction for plants, and arrives at an over-all rate for land plants of  $73 \pm 18 \times 10^{15}$  g. CO<sub>2</sub> per year.

The respiratory component is made up of the respiration of higher plants, approximately 20 per cent, of higher animals, and of soil organisms (bacteria, fungi, protozoa and soil invertebrates). The human contribution can be approximated; if we assume a population of  $2.7 \times 10^9$  and a daily calorie intake of 2500 kg. cal., the yearly CO<sub>2</sub> production is  $1.0 \pm 0.2 \times 10^{15}$  g. CO<sub>2</sub>. Thus human respiration may account for 1.4 per cent of land photosynthesis.

In a mature forest, the respiration of material on and within the soil will nearly balance the net photosynthesis (total photosynthesis minus respiration of the higher plants). The total CO<sub>2</sub> added by respiration of soil organisms may be 80 per cent of total photosynthesis under these conditions, whereas for agricultural land it may be only half of this. What percentage of the respiration is to be ascribed to bacteria, fungi, invertebrates, and higher plant roots is unknown.

TABLE 8\*  
TOTAL METABOLISM OF THE EARTH

|             | CO <sub>2</sub> Used                | O <sub>2</sub> Produced             |
|-------------|-------------------------------------|-------------------------------------|
| Ocean       | 462 ± 303 × 10 <sup>15</sup> g./yr. | 336 ± 218 × 10 <sup>15</sup> g./yr. |
| Land        | 73 ± 18 × 10 <sup>15</sup> g./yr.   | 53 ± 15 × 10 <sup>15</sup> g./yr.   |
| Whole earth | 535 ± 311 × 10 <sup>15</sup> g./yr. | 389 ± 231 × 10 <sup>15</sup> g./yr. |
| Unit area   | 105 ± 63 mg./cm. <sup>2</sup> /yr.  | 76 ± 45 mg./cm. <sup>2</sup> /yr.   |

\* From Hutchinson.<sup>2</sup>



Though the photosynthesis of certain areas of the seas may rival or exceed that of agricultural land,<sup>2</sup> an evaluation of the total photosynthesis is difficult. Riley<sup>24</sup> has given estimates, which are used as the basis for the information in table 8. Though there is uncertainty concerning the absolute magnitude, it is probably safe to assume that photosynthesis of land plants constitutes about one-fifth of the total, the remaining four-fifths occurring in the open seas. The respiration of marine animals probably comes far closer to a balance of marine photosynthesis than does that of land animals balance photosynthesis of land organisms. Though the productivity of the seas may be limited by light or temperature, during part of the year, the rapid growth of diatoms depletes the surface waters of nitrates, phosphates, and silicates. It is doubtful if CO<sub>2</sub> ever limits the growth of marine life. The rapid circulation of marine C through living organisms is limited to surface waters (0 to 400 m.) and the slow mixing in the seas means that the C of the ocean depths moves through the cycle of life at a very low rate.

#### CONCLUSIONS

All life appears to be dependent upon CO<sub>2</sub>, indirectly through the role of CO<sub>2</sub> in photosynthesis and directly as CO<sub>2</sub> is an essential part of the organism's own biosynthetic pathways and a determinant in development and differentiation. Carbon dioxide is part of the internal environment of all organisms and many small organisms which are unable to satisfy their needs by endogenously produced CO<sub>2</sub> are dependent upon external CO<sub>2</sub>. Larger organisms are rarely in diffusion equilibrium with their environments for CO<sub>2</sub>.

The CO<sub>2</sub> contents of the environments are varied. Though the CO<sub>2</sub> content of air is considered a constant, it may change by 100 per cent within a day over agricultural land. The CO<sub>2</sub> content of soils and waters, though far from constant, is frequently strikingly above that of the air. In micro-environments the activity of organisms plays an important role in the determination of CO<sub>2</sub> levels.

Though the quantity of CO<sub>2</sub> appears large, the atmospheric CO<sub>2</sub> passes through living organisms once in ten years. The quantities in the seas and carbonate rocks appear to be

tremendous, but in terms of biological activity over a period of one to two billion years these sums are not large.

The origin of life and its evolution cannot be understood without considering the geochemistry of the early earth and the recognition that the physiological functions found in advanced organisms are in part derived from mechanisms established by evolution in more primitive organisms. Nowhere is this more clearly established than in the relation of organisms to CO<sub>2</sub>.

#### REFERENCES

1. Urey, H. C.: *The Planets—Their Origin and Development*. New Haven, Conn., Yale University Press, 1952.
2. Hutchinson, G. E.: *Biochemistry of terrestrial atmosphere*, In Kuiper, G. E.: *The Solar System*, vol. 2, *The Earth as a Planet*. Chicago, University of Chicago Press, 1954, pp. 371–433.
3. Rockwell, G. E.: Study of gaseous requirements for growth of various bacteria, *J. Infect. Dis.* 28: 352, 1921.
4. Rockwell, G. E., and Highberger, J. H.: Necessity of carbon dioxide for growth of bacteria, yeasts and molds, *J. Infect. Dis.* 40: 438, 1927.
5. Wood, H. G., and Werkman, C. H.: Utilization of CO<sub>2</sub> in dissimilation of glycerol by the propionic acid bacteria, *Biochem. J.* 30: 48, 1936.
6. Carson, S. F., and Rubin, S.: CO<sub>2</sub> assimilation by propionic acid bacteria studied by use of radioactive carbon, *Proc. Nat. Acad. Sci.* 26: 422, 1940.
7. Wood, H. G., Werkman, C. H., Hemingway, A., and Nier, A. O.: Heavy carbon as tracer in heterotrophic CO<sub>2</sub> assimilation, *J. Biol. Chem.* 139: 365, 1941.
8. Thomas, M.: Carbon dioxide fixation and acid synthesis in crassulacean acid metabolism, *Symposia. Soc. Exp. Biol.* 5: 72, 1951.
9. McAlister, E. D.: Course of photosynthesis for higher plant, *Smithsonian Misc. Coll.* 95: 1, 1937.
10. Calvin, M., Bassham, J. A., Benson, A. A., Lynch, V. H., Oellett, C., Shaw, L. Stepka, W., and Tolbert, N. E.: Carbon dioxide assimilation in plants, *Symposia Soc. Exp. Biol.* 5: 284, 1951.
11. Hill, R.: Oxygen produced by isolated chloroplasts. *Proc. Royal Soc. (London B)* 127: 192, 1939.
12. Strehler, B. L.: Photosynthesis—energetics and phosphate metabolism, In McElroy, W. D. and Glass, B.: *Phosphorus Metabolism*, vol. 2, Baltimore, Johns Hopkins Press, 1952, pp. 491–506.

13. Frenkel, A. W.: Photophosphorylation of adenine nucleotides by cell-free preparations of purple bacteria, *J. Biol. Chem.* **222**: 823, 1956.
14. Arnon, D. I.: Chloroplasts and photosynthesis, *Brookhaven Symposia Biol.* **11**: 181, 1959.
15. Ochoa, S.: Biosynthesis of dicarboxylic and tricarboxylic acids by carbon dioxide fixation, *Symp. Soc. Exp. Biol.* **5**: 29, 1951.
16. Venesland, B., Collub, M. C., and Speck, J. F.:  $\beta$ -Carboxylases of plants; some properties of oxalacetic acid carboxylase and its quantitative assay, *J. Biol. Chem.* **178**: 301, 1949.
17. Loomis, W. F.: Feedback control of growth and differentiation by carbon dioxide tension and related metabolic variables, In Rudnick, D.: *Cell, Organism and Milieu*. New York, Ronald Press, 1959.
18. Rubey, W. W.: Geological history of sea water, *Bull. Geol. Soc. Amer.* **62**: 1111, 1951.
19. Glueckauf, E.: Composition of atmospheric air, *Comp. Meteorol. Soc. Boston*, 1951.
20. Quoted in Chapman, Gleeson and Loomis, reference 22.
21. Buch, K.: Beobachtungen über das Kohlensäuregleichgewicht und über den Kohlensäureaustausch Zwischen Atmosphäre und meer in Nord Atlantischen Ozean, *Acta Acad. Aboensis Math. et Physica* **11**: 1, 1939.
22. Chapman, H. W., Gleeson, and Loomis, W. E.: Carbon dioxide content of field air, *Plant Physiol.* **29**: 500, 1954.
23. Hutchinson, G. E.: *A Treatise on Limnology*, vol. 1. New York, John Wiley and Sons, Inc., 1957.
24. Berg, D. and Patterson A.: High field conductance of aqueous solution of carbon dioxide at 25°. True ionization constant of carbonic acid, *J. Amer. Chem. Soc.* **75**: 5197, 1953.
25. Horned, H. S., and Davis, R.: Ionization constant of  $H_2CO_3$  in water, and solubility of  $CO_2$  in water and aqueous solution from 0 to 50°, *J. Amer. Chem. Soc.* **62**: 2030, 1943.
26. Russell, E. J. and Appleyard, A.: Atmosphere of the soil: its composition and the causes of variation, *J. Agric. Sci.* **7**: 1, 1915.
27. Buch, K.: Das Kohlensäure gleichgewichtssystem in Meervasser Hansforskn, *Inst. Skr. Helsingf.* **151**. Quoted in Harvey, reference 28.
28. Harvey, H. W.: *The Chemistry and Fertility of Sea Water*. London, Cambridge University Press, 1957.
29. Schlosing, Th.: Sur la constance de la proportion d'acide carbonique dans l'air, *Compt. Rend. Acad. Sci. Paris* **90**: 1410, 1880.
30. Krogh, A.: On tension of carbon dioxide in natural waters and especially in the sea, *Meddeleker om Gronland* **26**: 342, 1904.
31. Buch, K.: Kohlensäure in Atmosphäre und Meer an der Greuze zun Arktikum, *Acta Acad. Aboensis Math. et Physica*, **11**: 1, 1939.
32. Callendar, G. S.: *Quart. J. R. Meteorol. Soc. London* **66**: 395, 1940. Quoted by Hutchinson, reference 2.
33. Kuiper, G. P.: *The Atmosphere of the Earth and Planets* (revised ed.). Chicago, University of Chicago Press, 1952, Ch. 12.
34. Riley, G. A.: Carbon metabolism and photosynthetic efficiency of earth as whole, *Amer. Sci.* **32**: 129, 1944.
